# Supplementary material for: Knockout of zebrafish desmin genes does not cause skeletal muscle degeneration but alters calcium flux
Source: PubMed Central journal article supplement (PMC8021586; doi:10.1038/s41598-021-86974-w), 2021-04-05
Supplement: 41598_2021_86974_MOESM2_ESM.pdf [file 41598_2021_86974_MOESM2_ESM.pdf]

## SUPPLEMENTARY TABLE

### Knockout of zebrafish desmin genes does not cause skeletal muscle degeneration but alters calcium flux

Gulsum Kayman Kurekci, Ecem Kural Mangit, Cansu Koyunlar, Seyda Unsal, Berk Saglam, Bora Ergin, Merve Gizer, Ismail Uyanik, Niloufar Boustanabadimaralan Düz, Petek Korkusuz, Beril Talim, Nuhan Purali, Simon M. Hughes, Pervin R. Dincer.

**Table S1.** List of primer sequences used in for synthesis of ISH probes, genotyping and qPCR experiments.

|                                 | Forward primer sequence                            | Reverse primer sequence                                |
|---------------------------------|----------------------------------------------------|--------------------------------------------------------|
| <i>desma</i> antisense probe    | 5'-TACATCGAGAAGGTGCGCTT-3'                         | 5'-GGATCCATTAACCCTCACTAAAGGGAATTGTCTCCATGCGTCATCCA-3'  |
| <i>desmb</i> antisense probe    | 5'-AATGACCGCTTCGCCAACTA-3'                         | 5'-GGATCCATTAACCCTCACTAAAGGGAACCTCTCCATCACGTGTC TCG-3' |
| <i>desma</i> sense probe        | 5'-TAATACGACTCACTATAGGGA GATACATCGAGAAGGTGCGCTT-3' | 5'-TTGTCTCCATGCGTCATCCA-3'                             |
| <i>desmb</i> sense probe        | 5'-TAATACGACTCACTATAGGGAG AAATGACCGCTTCGCCAACTA-3' | 5'-CCTCTCCATCACGTGTCTCG-3'                             |
| <i>desma</i> genotyping primers | 5'-CGCACGGTGGCTGGAAAA-3'                           | 5'-CACGGTTCCTCAGGTTCTC-3'                              |
| <i>desmb</i> genotyping primers | 5'-GTCATCCACTTCTTCTCCTGG-3'                        | 5'-GTGCGAGTGTGGAGAAACTC3'                              |
| <i>desma</i> qPCR primers       | 5'-GCTGCCAAGAATATCAGCGA-3'                         | 5'-TGCCTCCTCAGAGACTCATT-3'                             |
| <i>desmb</i> qPCR primers       | 5'-ATGCAAGAGACCCAAGTCCA-3'                         | 5'-TCTTGCTCACAGCCTGGTTA-3'                             |
| <i>actb1</i> qPCR primers       | 5'-TCTTCCAGCCTTCCTTCTG-3'                          | 5'-TGTGTTGGCATAACAGGTCCT-3'                            |
| <i>vim</i> qPCR primers         | 5'-ACCTAGGGGAGGACATCGAG-3'                         | 5'-CGAGCCAGAGAGGCGTTATC-3'                             |
| <i>rpl13a</i> qPCR primers      | 5'-TCTGGAGGACTGTAAGAGGTATGC-3'                     | 5'-AGACGCACAATCTTGAGAGCAG-3'                           |
